# Supplementary material for: Mutations in the PIK3C2B, ERBB3, KIT, and MLH1 Genes and their Relationship with Resistance to Temozolomide in Patients with High-grade Gliomas
Source: Preprints.org preprint supplement (doi:10.20944/preprints202305.1353.v1), 2023-05-18
Supplement: Supplementary file 1 [file supplementary]

Archive with 4 entries (4 files):
- Supplemental Figure 1. Leave-one-out analysis.pdf
- Supplemental Figure 2. Contour-enhanced funnel plot.pdf
- Supplemental Figure 3. Funnel Plot (Trim & Fill Method).pdf
- Supplemental Tables.xlsx
