# Supplementary material for: Mutations in the PIK3C2B, ERBB3, KIT, and MLH1 Genes and their Relationship with Resistance to Temozolomide in Patients with High-grade Gliomas
Source: Preprints.org preprint supplement (doi:10.20944/preprints202305.1353.v1), 2023-05-18
Supplement: Supplementary file 1 [file supplementary › Supplemental Tables.xlsx]

## Sheet: study characteristics
Characteristics of studies included in quantitative synthesis
	Study No.	1	2	3	4	5	6: a	6: b	7: a	7: b	8	9	10	11	12: a	12: b	13	14	15	16
Publication Information
First Author		Brosgole	Wong	Laukka	Mitchell	Ruffman	Schaffer	Schaffer	Hunter	Hunter	Ryan	Mitchell	Lima	Chaby	Dupuis	Dupuis	Seddoh	Cortes	Maltezou-Papastylianou	Martzoukou
Year		1995	2005	2007	2007	2009	2009a	2009b	2010a	2010b	2010	2011	2014	2015	2015a	2015b	2018	2021	2022	2022
Source		Journal	Journal	Journal	Journal	Journal	Journal	Journal	Journal	Journal	Journal	Journal	Journal	Journal	Journal	Journal	Journal	Journal	Journal	Journal
Participant Information
Country		the US	the US	Sweden	the UK	New Zealand	the US	the US	the UK	the UK	New Zealand	the UK	Portugal	France	Canada	Canada	the US	Sweden	the UK	Greece
Region		North America	North America	Europe	Europe	Oceania	North America	North America	Europe	Europe	Oceania	Europe	Europe	Europe	North America	North America	North America	Europe	Europe	Europe
Language		English	English	Swedish	English	English	English	English	English	English	English	English	Portuguese	French	English	English	English	Swedish	English	Greek
Sample size (YA:OA)		155:28	20:20	30:30	40:40	60:61	10:10:00	10:10:00	25:25	20:20:00	40:40	45:45	43:43	31:31	56:28	28:28	26:14	71:60	21:21:00	20:20:00
Total sex ratio (F:M)		108:75	21:19	31:29	58:22	70:51	11:9	10:10:00	26:24	22:18:00	50:30	72:18	52:34	33:29	59:25	29:27	#	76:55	27:15	20:20:00
YA Information
Sex ratio (F:M)		85:70	10:10	15:15	34:6	34:26	5:5	5:5	16:9	12:8	25:15	43:2	22:21:00	16:15:00	39:17	17:11:00	12:14:00	36:35	11:10:00	10:10:00
Mean Age (SD)		27.5	19.2 (1.3)	23.6 (3.19)	19.6 (1.7)	20.5	26 (3.2)	35 (3.4)	22.64 (5.86)	20 (1.48)	21.63	20.1 (2.40)	22 (2.2)	25.8 (6.4)	19.7 (2.7)	21.6 (3.3)	21	23.42 (2.83)	21.52 (2.58)	23 (1.41)
Age Range		18-43	#	20-33	18-27	18-35	#	#	18-40	18-23	17-29	18-35	19-27	20-35	#	#	21-27	18-30	#	20-25
Education Year		NM	14.4	#	#	NM	15 (2.0)	14 (2.6)	15.08 (2.25)	NM	NM	14.3 (0.81)	15.4 (1.7)	14.18 (1.6)	13.5 (0.28)	16.2 (0.47)	NM	11.11 (5.67)	All university educated	13.6 (2.01)
Hearing sensitivity		No apparent auditory disturbance	No hearing difficulties	Self-report hearing status	PTA = 15.8 dB	NM	Adequate enough to engage in normal conversation	Adequate enough to engage in normal conversation	NM	NM	No hearing difficulties	12.3 dB (5.76)	PTA < 30 dB HL in both ears; self-report scale = 1.8 (0.6) (1 for very good hearing, 6 for very bad hearing)	Self-report good hearing abilities	PTAB = －0.4 dB (0.5); HFPTAB = －1.2 dB (0.6)	PTAB = －2.4 dB (0.6); HFPTAB = －2.4 dB (0.6)	Less than 30 dB at 500 Hz, 1000 Hz, 2000 Hz, and 4000 Hz	No hearing problems.	No hearing problems	Normal hearing
Mental status		NM	BDI-II = 4.4, all less than 10; No history of psychiatric illness, or neurological illness or ingury.	NM	BDI = 5.9	NM	BDI-II; BAI; SCID-I	BDI-II; BAI; SCID-I	No history of or psychiatric disorders	No history of psychiatric disorders	NM	BDI = 6.0 (4.49)	NM	BDI-II = 5.65 (6.5)	NM	NM	No history of psychiatric problems.	No presence of a psychaiatric, neurological or neurodegenerative disorder.	NM	No history of psychiatric disorder.
Cognitive status		1. 5-10 minute interveiw 2. Orientation test 3. Short term memory test	NM	MMSE more than 27	Verbal IQ = 121.3 Reading span = 2.9	No reported cognition impairment; two subtests of the Culture Fair Intelligence Test for fluid intelligence; the Peabody Picture Vocabulary Test for crystallized intelligence	MMSE; WAIS-III: 1. Verbal IQ = 118 (11); 2. Performance IQ = 115 (23); 3. Full Scale IQ = 118 (15)	MMSE; WAIS-III: 1. Verbal IQ = 113 (13); 2. Performance IQ = 117 (17); 3. Full Scale IQ = 116 (14)	WTAR = 111.24 (5.31); DSST from WAIS = 67.76 (10.91)	WTAR = 111.15 (4.05); DSST from WAIS = 64.35 (10.15)	Culture Fair Intelligence Test for fluid intelligence; the vocabulary subtest of the WAIS-R for crystallized intelligence	National Adult Reading Test (predicted full-scale IQ) = 113.8 (4.78)	MoCA scores higher than 21: MoCA = 27.4 (1.7); Vocabulary WAIS-III = 45.5 (7.7); Digit Span WAIS-III (forward) = 6.2 (1.3); Digit Span WAIS-III (backward) = 4.7 (1.1); Stroop test (baseline) = 0.7 (0.1); Stroop test (conflict condition) = 1 (0.2)	Mill Hill Vocabulary Scale = 36.87 (3.0)	Mill Hill Vocabulary Scale = 12.4 (0.36)	Mill Hill Vocabulary Scale = 13.4 (0.44)	No history of cognitive problems based on self-report.	MMSE scores higher than 26: MMSE = 28.99 (1.37)	NM	MoCA scores higher than 26: MoCA = 29.65 (0.59); SPT = 32 (0.00); BNT = 15
OA Information
Sex ratio (F:M)		23:5	11:9	16:14	24:16	36:25	6:4	5:5	10:15:00	10:10:00	25:15	29:16	30:13	17:14:00	20:8	12:16:00	#	40:20	16:5	10:10:00
Mean Age (SD)		75.2	69.5 (5.4)	71.7 (4.51)	70.5 (5.8)	70.5	65 (2.6)	74 (3.0)	66.96 (6.1)	70.55 (4.12)	65.6	70.6 (5.01)	61.4 (7.9)	67.2 (5.8)	69.8 (4.5)	70.7 (4.0)	#	69.22 (3.16)	67.9 (4.53)	72.2 (1.99)
Age Range		65-83	#	65-85	61-83	60-85	#	#	60-79	63-78	60-84	60-85	47-83	60-76	#	#	#	58-75	#	70-75
Education Year		NM	16.3	#	#	NM	15 (2.1)	14 (2.9)	15.40 (3.67)	NM	NM	14.7 (4.16)	14.4 (2.9)	13.55 (2.8)	15.3 (0.53)	16.1 (0.61)	12-24 yrs	15.88 (4.15)	12 university educated	10.4 (3.97)
Hearing sensitivity		No apparent auditory disturbance	No hearing difficulties	Self-report hearing status	PTA = 24.4 dB	NM	Adequate enough to engage in normal conversation	Adequate enough to engage in normal conversation	NM	NM	No hearing difficulties	21.4 dB (7.74)	PTA < 30 dB HL in both ears; self-report scale = 2.5 (1) (1 for very good hearing, 6 for very bad hearing)	Self-report good hearing abilities	PTAB = 10.5 dB (1.2); HFPTAB = 14.0 dB (1.1)	PTAB = 6.8 dB (1.0); HFPTAB = 11.0 dB (1.1)	Less than 30 dB at 500 Hz, 1000 Hz, 2000 Hz, and 4000 Hz	No hearing problems.	No hearing problems	Normal hearing
Mental status		NM	GDS = 3.4, all less than 15; No history of psychiatric illness, or neurological illness or ingury.	NM	BDI = 6.6	NM	BDI-II; BAI; SCID-I	BDI-II; BAI; SCID-I	No history of psychiatric disorders	No history of or psychiatric disorders	NM	BDI = 4.9 (3.33)	NM	BDI-II = 5.25 (3.8)	NM	NM	No history of psychiatric problems.	No presence of a psychaiatric, neurological or neurodegenerative disorder.	NM	No history of psychiatric disorder.
Cognitive status		1. 5-10 minute interveiw 2. Medical history check 3. Orientation test 4. Short term memory test	Dementia Rating Scale more than 134; MMSE more than 25	MMSE more than 27	Verbal IQ = 119.9 Reading span = 3.0	No reported cognition impairment; two subtests of the Culture Fair Intelligence Test for fluid intelligence; the Peabody Picture Vocabulary Test for crystallized intelligence	MMSE; WAIS-III: 1. Verbal IQ = 111 (11); 2. Performance IQ = 115 (15); 3. Full Scale IQ = 113 (23)	MMSE; WAIS-III: 1. Verbal IQ = 115 (17); 2. Performance IQ = 111 (22); 3. Full Scale IQ = 113 (20)	WTAR = 113.88 (5.94); DSST from WAIS = 51.20 (10.10)	WTAR = 108.50 (5.58); DSST from WAIS = 44.60 (10.34)	Culture Fair Intelligence Test for fluid intelligence; the vocabulary subtest of the WAIS-R for crystallized intelligence	National Adult Reading Test (predicted full-scale IQ) = 123.6 (3.73)	MoCA scores higher than 21: MoCA = 26 (2.2); Vocabulary WAIS-III = 47.5 (7.1); Digit Span WAIS-III (forward) = 6.2 (1.3); Digit Span WAIS-III (backward) = 4.7 (1.1); Stroop test (baseline) = 0.8 (0.1); Stroop test (conflict condition) = 1.3 (0.3)	Mill Hill Vocabulary Scale = 37.48 (4.8); MMSE scores higher than 26: MMSE = 29.33 (0.6)	Mill Hill Vocabulary Scale = 14.9 (0.47)	Mill Hill Vocabulary Scale = 14.9 (0.47)	No history of cognitive problems based on self-report.	MMSE scores higher than 26: MMSE = 29.23 (0.95)	NM	MoCA scores higher than 26: MoCA = 26.65 (0.67); SPT = 31.05 (0.76); BNT = 15
Methodological Features
Task Paradigm	identification	identification	identification	identification	identification	identification	identification+discrimination	identification+discrimination	identification	identification	identification	identification	identification	identification	identification	identification	identification	identification	identification	identification
	discrimination
Material	SPP	SNSC	SNSC	SNSC	SNSC	#	SNSC+SIMP+SCMP	SNSC+SIMP+SCMP	SPP	SPP	SPP + SNSC	SPP + SNSC	SPP	SPP	SNSC	SNSC	SNSC	SPP	SPP	SNSC
	SNSC
	SCMP
	SIMP
Stimulus Modality (A)		A	A	A	A	A	A	A	A	A	A	A	A	A	A	A	A	A	A	A
Stimulus Form	sentence	sentence	sentence	sentence	sentence	#	sentence	sentence	monophthong /a/	monophthong /a/	nonverbal vocalizations + sentence	sentence	nonverbal vocalizations	nonverbal vocalizations	sentence	sentence	sentence	nonverbal vocalization	sentence	sentence
	nonverbal vocalization
	monophthong
	filtered sentence
Speaker Number		#	#	3	1	#	1	1	8	#	2	2	8	10	in total 2, 1 for each participant	in total 2, 1 for each participant	1	#	1	1
Speaker age		#	#	51	#	#	#	#	#	#	#	#	27-43	#	#	#	27	#	#	46
Speaker sex ratio (F:M)		#	1:1	2:1	0:1	#	0:1	0:1	4:4	#	1:1	1:1	4:4	5:5	1:0	1:0	0:1	#	1:0	0:1
Response Option		choice	choice	choice	choice	choice	choice	choice	choice	choice	choice	choice	rating	choice	choice	choice	choice	choice	choice	choice
Number of trials		18	18	33	20	24	30	30	48	40	12	96	320	60	980	980	50	108	196	30
Nmuber of stimuli per emotion		6	3	6	10	4	#	#	8	10	2	48	80	10	140	140	25	12	28	5
Number of Answer Options		3	6	7	2	6	5 for identification tasks; 2 for discrimination tasks	5 for identification tasks; 2 for discrimination tasks	6	4	6	2	8	6	7	7	3	9	7	6
Emotions		happiness, sadness, anger	happiness, sadness, anger, fear, disgust, positive surprise	happiness, sadness, anger, fear, disgust, neutral	happiness, sadness	happiness, sadness, anger, fear, surprise, disgust	happiness, sadness, anger, fright, neutral	happiness, sadness, anger, fright, neutral	happiness, sadness, anger, disgust, fear, surprise	sadness, anger, fear, disgust	happiness, sadness, fear, disgust, surprise, anger	happiness, sadness	sadness, anger, disgust, fear	happiness, sadness, anger, fear, disgust, neutral	happiness, sadness, anger, fear, disgust, pleasant surprise, neutral	happiness, sadness, anger, fear, disgust, pleasant surprise, neutral	happiness, sadness	happiness, sadness, anger, fear, disgust, posotive surprise, negative surprise	anger, disgust, fear, happiness, sadness, pleasant surprise, neutral	neutral, happiness, surprise, sadness, fear, anger
Notes		Excluded from the meta-analysis for overall performance	Excluded from the meta-analysis for overall performance				Group 1 vs. Group 5	Group 2 vs. Group 6					Excluded from the meta-analysis for overall performance	Excluded from the meta-analysis for overall performance	Individual emotion results were collapsed across two experiments		Excluded from the meta-analysis for overall performance	Excluded from the meta-analysis for overall performance
Major results	YA-means (SD)	#	#	F(1,58) = 26.61	86.3 (SE=1.3)	F(1, 119) = 19.28	86.0 (4.9)	91.3 (5.0)	F(1, 48) = 33.8	t(38) = 3.84	t(78) = 2.74	F(1, 88) = 38.79	#	#	82.1 (11.4)	83.7 (14.4)	#	#	75.74 (6.92)	91.30 (5.12)
	OA-means (SD)	#	#		79.5 (SE=2.7)		66.0 (16.3)	64.0 (17.0)					#	#	65.8 (19.4)	64.5 (14.1)	#	#	68.8 (9.1)	61.37 (14.59)
	YA-happiness (SD)	0.9867 (0.06)	F(5, 195) = 6.2	#	#	t(119) = 3.10	#	#	93.12 (11.95)	NM	#	t(88) = 2.46	NM	98.0 (SE=0.9)	79.0 (24.5)		96.28 (4.8)	0.26 (0.16)	52.20 (19.75)	78 (17.05)
	OA-happiness (SD)	0.8217 (0.235)		#	#		#	#	94.08 (10.80)	NM	#		NM	95.2 (SE=1.9)	60.0 (28.2)		92.56 (38.6)	0.23 (0.14)	34.86 (17.89)	70 (22.94)
	YA-sadness (SD)	0.9917 (0.0517)	F(5, 195) = 13.8	#	#	t(119) = 4.87	#	#	96.08 (9.22)	98.75 (3.19)	t(78) = 3.46	t(88) = 6.65	80.9 (SE=2.9)	94.2 (SE=1.3)	90.8 (17.4)		96.6 (4.76)	0.62 (0.14)	83.18 (13.66)	93.00 (9.79)
	OA-sadness (SD)	0.935 (0.1317)		#	#		#	#	84.48 (21.48)	94.50 (9.44)			61.4 (SE=5.1)	94.5 (SE=1.3)	76.3 (19.2)		90.88 (45.44)	0.48 (0.17)	84.35 (14.62)	64.00 (26.44)
	YA-anger (SD)	0.99 (0.0433)	#	#	NM	t(119) = 7.49	#	#	78.68 (16.65)	69.25 (20.27)	t(78) = 2.92	NM	74.9 (SE=3.4)	62.9 (SE=3.0)	96.5 (9.7)		NM	0.68 (0.16)	92.33 (8.83)	96.00 (8.21)
	OA-anger (SD)	0.8033 (0.2933)	#	#	NM		#	#	49.76 (20.53)	60.50 (25.02)		NM	39.5 (SE=4.5)	47.7 (SE=3.4)	78.0 (17.9)		NM	0.51 (0.17)	86.56 (12)	43.00 (31.31)
	YA-fear (SD)	NM	#	#	NM	#	#	#	84.64 (13.63)	81.75 (17.11)	#	NM	77.2 (SE=2.8)	86.7 (SE=2.3)	87.4 (19.8)		NM	0.45 (0.17)	64.24 (18.95)	89.00 (15.18)
	OA-fear (SD)	NM	#	#	NM	#	#	#	63.76 (21.59)	67.00 (21.78)	#	NM	49.5 (SE=4.5)	73.2 (SE=3.9)	69.6 (29.1)		NM	0.26 (0.14)	56.97 (14.04)	53.67 (26.27)
	YA-disgust (SD)	NM	#	#	NM	#	NM	NM	90.08 (11.39)	96.00 (8.20)	#	NM	91.2 (SE=1.5)	94.8 (SE=1.2)	76.2 (27.6)		NM	0.63 (0.18)	78.73 (19.21)	NM
	OA-disgust (SD)	NM	#	#	NM	#	NM	NM	75.16 (10.21)	82.50 (14.82)	#	NM	74 (SE=4.2)	86.4 (SE=2.3)	49.4 (30.7)		NM	0.35 (0.17)	65.99 (27.84)	NM
	YA-surprise (SD)	NM	#	NM	NM	#	NM	NM	58.76 (21.86)	NM	#	NM	NM	NM	64.9 (25.5)		NM	0.37 (0.14) for positive surprise; 0.40 (0.16) for negative surprise	68.69 (17.03)	94.00 (11.43)
	OA-surprise (SD)	NM	#	NM	NM	#	NM	NM	62.72 (17.24)	NM	#	NM	NM	NM	58.4 (24.2)		NM	0.20 (0.09) for positive surprise; 0.28 (0.13) for negative surprise	68.71 (14.06)	63.25 (28.02)
	YA-neutral (SD)	NM	NM	#	NM	NM	#	#	NM	NM	NM	NM	NM	96.7 (SE=0.9)	83.5 (23.6)		NM	NM	90.82 (7.71)	98.00 (6.16)
	OA-neutral (SD)	NM	NM	#	NM	NM	#	#	NM	NM	NM	NM	NM	92.6 (SE=2.7)	64.3 (33.8)		NM	NM	84.18 (15.71)	74.17 (28.45)
Effects of group		#	No	Yes	Yes	Yes	#	#	Yes	Yes	Yes	Yes	#	#	Yes	Yes	#	NM	Yes	#
Quality Index Score		0.77	0.77	0.86	1	0.86	0.95	0.95	0.86	0.86	0.86	0.91	1	0.95	0.86	0.91	0.73	0.95	0.68	0.82
Abbreviations	A = auditory; SD = standard deviation; OA = healthy older adults, YA = healthy younger adults; M = male; F = female; #: not provided; NM: not measure; GDS: Geriatric Depression Scale; PTA: pure tone average; BDI: Beck's Depression Inventory; BDI-II: Beck Depression Inventory-Second Revision; BAI: Beck Anxiety Inventory; SCID-I: Structured Clinical Interview for the DSM-IV Axis I Disorders; SPP: s…

## Sheet: effect sizes
Effect sizes of included study for APR of each emotion
	Year	First author	Sample Size (YA:OA)	Hedges g (SE) for overall recognition accuracy	Hedges g (SE) for individual emotion recognition accuracy
					Happiness	Sadness	Anger	Fear	Disgust	Surprise	Neutral
1	1995	Brosgole	155:28	#	-1.55 (0.22)	-0.81 (0.21)	-1.55 (0.22)	NM	NM	NM	NM
2	2005	Wong	20:20	#	-0.77 (0.33)	-1.15 (0.34)	#	#	#	#	NM
3	2007	Laukka	30:30	-1.31 (0.29)	#	#	#	#	#	#	#
4	2007	Mitchell	40:40	-0.51 (0.23)	#	#	NM	NM	NM	NM	NM
5	2009	Ruffman	60:61	-0.79 (0.19)	-0.56 (0.19)	-0.88 (0.19)	-1.35 (0.2)	#	#	#	NM
6a	2009	Schaffer	10:10	-1.59 (0.52)	#	#	#	#	NM	NM	#
6b	2009	Schaffer	10:10	-2.09 (0.56)	#	#	#	#	NM	NM	#
7a	2010	Hunter	25:25	-1.62 (0.33)	0.08 (0.28)	-0.69 (0.29)	-1.52 (0.32)	-1.14 (0.31)	-1.36 (0.31)	0.2 (0.28)	NM
7b	2010	Hunter	20:20	-1.19 (0.34)	NM	-0.59 (0.32)	-0.38 (0.32)	-0.74 (0.33)	-1.1 (0.34)	NM	NM
8	2010	Ryan	40:40	-0.61 (0.23)	#	-0.77 (0.23)	-0.65 (0.23)	#	#	#	NM
9	2011	Mitchell	45:45	-1.3 (0.23)	-0.51 (0.21)	-1.39 (0.24)	NM	NM	NM	NM	NM
10	2014	Lima	43:43	#	NM	-0.72 (0.22)	-1.36 (0.24)	-1.13 (0.23)	-0.83 (0.23)	NM	NM
11	2015	Chaby	31:31	#	-0.34 (0.26)	0.04 (0.25)	-0.85 (0.27)	-0.76 (0.26)	-0.83 (0.26)	NM	-0.37 (0.26)
12a	2015	Dupuis	56:28	-1.11 (0.25)	-0.73 (0.18)	-0.8 (0.18)	-1.36 (0.19)	-0.74 (0.18)	-0.92 (0.18)	-0.26 (0.17)	-0.68 (0.18)
12b	2015	Dupuis	28:28	-1.33 (0.3)
13	2018	Seddoh	26:14	#	-0.16 (0.33)	-0.21 (0.33)	NM	NM	NM	NM	NM
14	2021	Cortes	71:60	#		-0.9 (0.18)	-1.03 (0.19)	-1.2 (0.19)	-1.59 (0.2)	Pos: -1.41 (0.2) Neg: -0.81 (0.18)	NM
15	2022	Maltezou-Papastylianou	21:21	-0.84 (0.32)	-0.9 (0.32)	0.08 (0.31)	-0.54 (0.31)	-0.43 (0.31)	-0.52 (0.31)	0 (0.31)	-0.53 (0.31)
16	2022	Martzoukou	20:20	-2.68 (0.44)	-0.39 (0.32)	-1.43 (0.36)	-2.27 (0.41)	-1.61 (0.37)	NM	-1.41 (0.35)	-1.13 (0.34)
Note: (1) Negative effect size Hedge’s g indicates lower recognition accuracy in OA participants compared to YA controls; (2) OA = healthy older adults; YA = healthy younger adults; # = insufficient data for effect size estimate; NM = not measured; Pos = positive; Neg = negative

## Sheet: meta-regression 
Results of the meta-regression analyses
Moderator	Across all emotions			Happiness			Sadness			Anger			Fear			Disgust			Surprise			Neutral
	Coefficient (β)	95% CI	p-value	Coefficient (β)	95% CI	p-value	Coefficient (β)	95% CI	p-value	Coefficient (β)	95% CI	p-value	Coefficient (β)	95% CI	p-value	Coefficient (β)	95% CI	p-value	Coefficient (β)	95% CI	p-value	Coefficient (β)	95% CI	p-value
Demographic characteristics of OA
Mean age	-0.08	-0.21 to 0.04	0.194	-0.14	-0.22 to -0.07	0.0002*	-0.04	-0.11 to 0.03	0.23	-0.0398	-0.12 to 0.04	0.3273	0.0031	-0.07 to 0.08	0.9357	-0.0327	-0.13 to 0.07	0.5126	-0.2704	-0.56 to 0.02	0.0686	-0.1265	-0.27 to 0.02	0.0853
Gender distribution (male percentage)	-2.56	-5.15 to 0.04	0.053	2.87	1.02 to 4.72	0.0024*	-0.44	-2.59 to 1.70	0.685	-0.4534	-3.02 to 2.12	0.7296	-0.7145	-2.98 to 1.55	0.5365	-1.1122	-3.79 to 1.56	0.4148	0.8747	-4.24 to 5.99	0.7377	-1.0639	-4.20 to 2.07	0.5056
Years of education	0.25	0.08 to 0.43	0.004*	-0.02	-0.16 to 0.12	0.8139	0.03	-0.18 to 0.23	0.797	0.1362	-0.04 to 0.32	0.1376	0.0786	-0.07 to 0.23	0.3083	-0.241	-0.57 to 0.09	0.1523	0.134	-0.18 to 0.44	0.3957	0.0812	-0.13 to 0.30	0.4592
Task-related methodologies
Material type				#			#			#			#			#			#			#
SNSC	Reference
SPP	0.09	-0.76 to 0.93	0.842
SPP + SNSC	0.35	-0.57 to 1.26	0.459
SPP + SCMP + SIMP	-0.53	-1.67 to 0.61	0.362
Task difficulty
Number of speakers	-0.04	-0.22 to 0.14	0.672	0.05	-0.00 to 0.11	0.064	0.0437	-0.05 to 0.14	0.3816	0.0026	-0.16 to 0.12	0.9655	-0.0138	-0.09 to 0.06	0.7273	-0.0147	-0.07 to 0.04	0.603	0.1042	-0.13 to 0.33	0.3747	0.0396	-0.02 to 0.10	0.2282
Number of trials	0	0.00 to 0.00	0.968	0	0.00 to 0.00	0.7105	0	0.00 to 0.00	0.9491	-0.0002	0.00 to 0.00	0.7104	0.0003	0.00 to 0.00	0.3262	0.0003	0.00 to 0.00	0.535	0.0006	0.00 to 0.00	0.525	0	0.00 to 0.00	0.97
Number of answer options	-0.05	-0.22 to 0.11	0.525	0.06	-0.07 to 0.19	0.3516	0.0282	-0.09 to 0.14	0.6295	0.0083	-0.17 to 0.19	0.9289	-0.0678	-0.22 to 0.08	0.3789	-0.0634	-0.26 to 0.13	0.5261	-0.2323	-0.66 to 0.19	0.2831	0.056	-0.61 to 0.72	0.8691
Positivity (only for Surprise)																			0.4235	-1.14 to 1.99	0.5964
Note: NM = not measured; # = insufficiant data to estimate; OA = older adults; CI = confidence interval; Age coverage = upper age – lower age; Gender distribution = number of male / total number of subjects; SPP = stimuli with pure prosody (without semantic content); SNSC = stimuli with neutral semantic content; SCMP = stimuli with congruent meaning and prosody; SIMP = stimuli with incongruent me…
*p < 0.05
