# Supplementary figures and images for: Mutations in the PIK3C2B, ERBB3, KIT, and MLH1 Genes and their Relationship with Resistance to Temozolomide in Patients with High-grade Gliomas
Source: Preprints.org preprint supplement (doi:10.20944/preprints202305.1353.v1), 2023-05-18

Sorted by  $I^2$

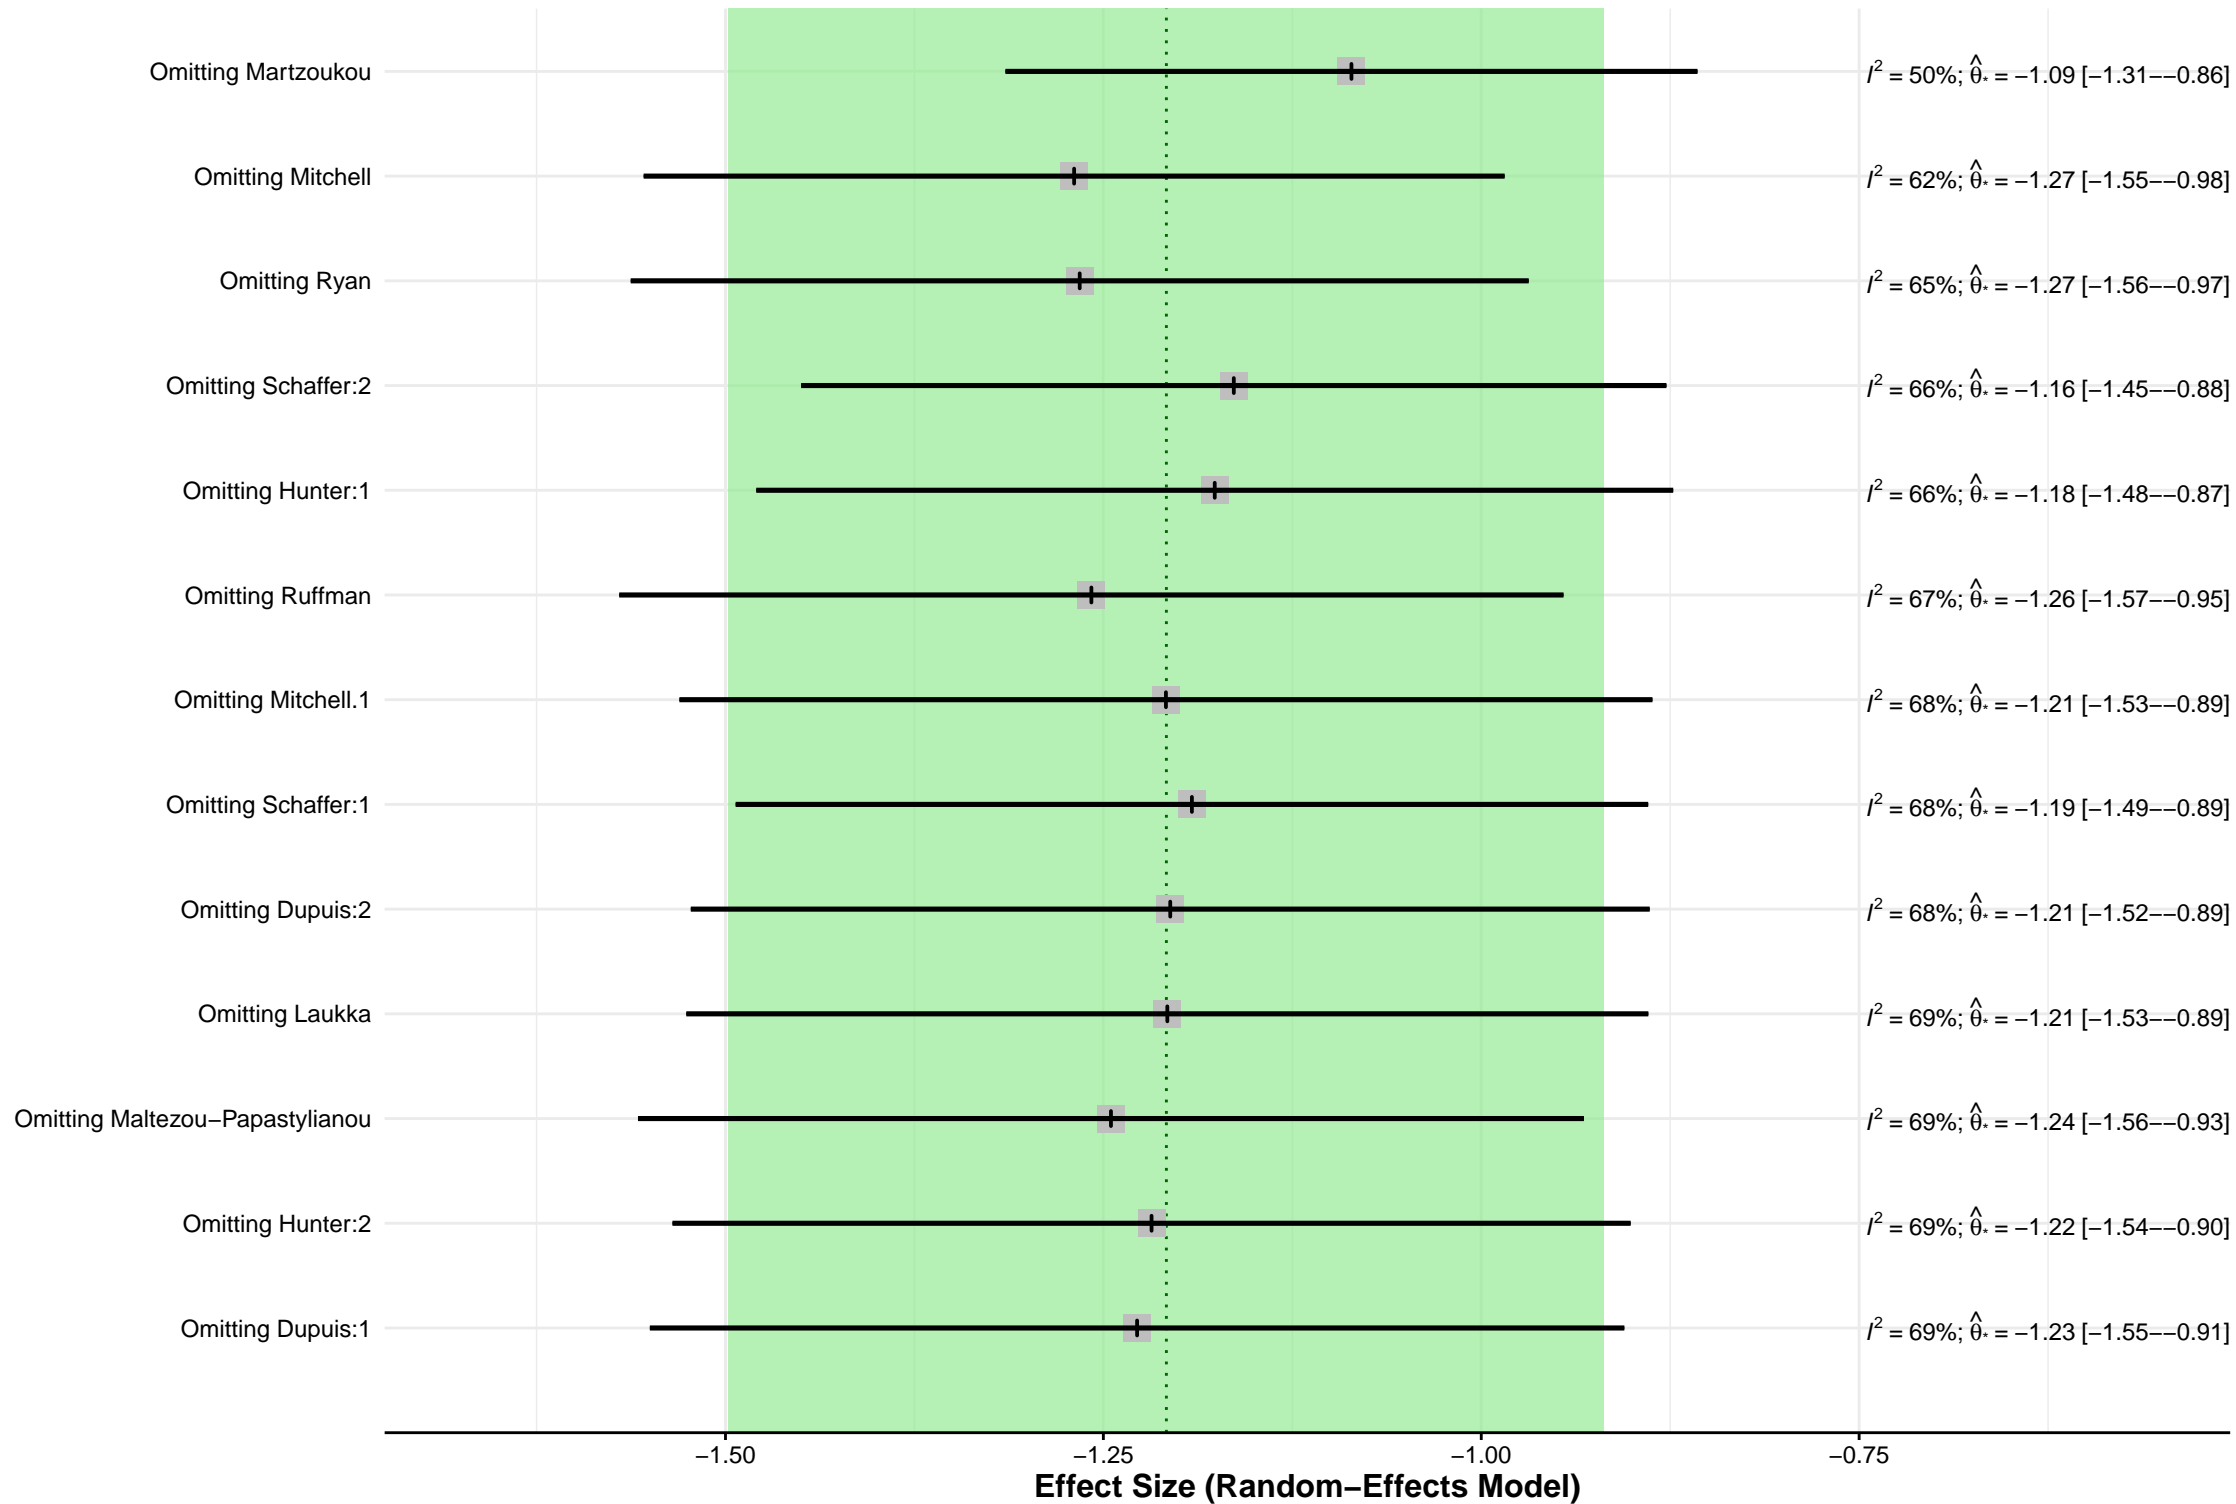

Supplement: Supplementary file 1 [file supplementary › Supplemental Figure 1. Leave-one-out analysis.pdf]

Contour-Enhanced Funnel Plot (Affective Prosody Recognition in Older Adults)

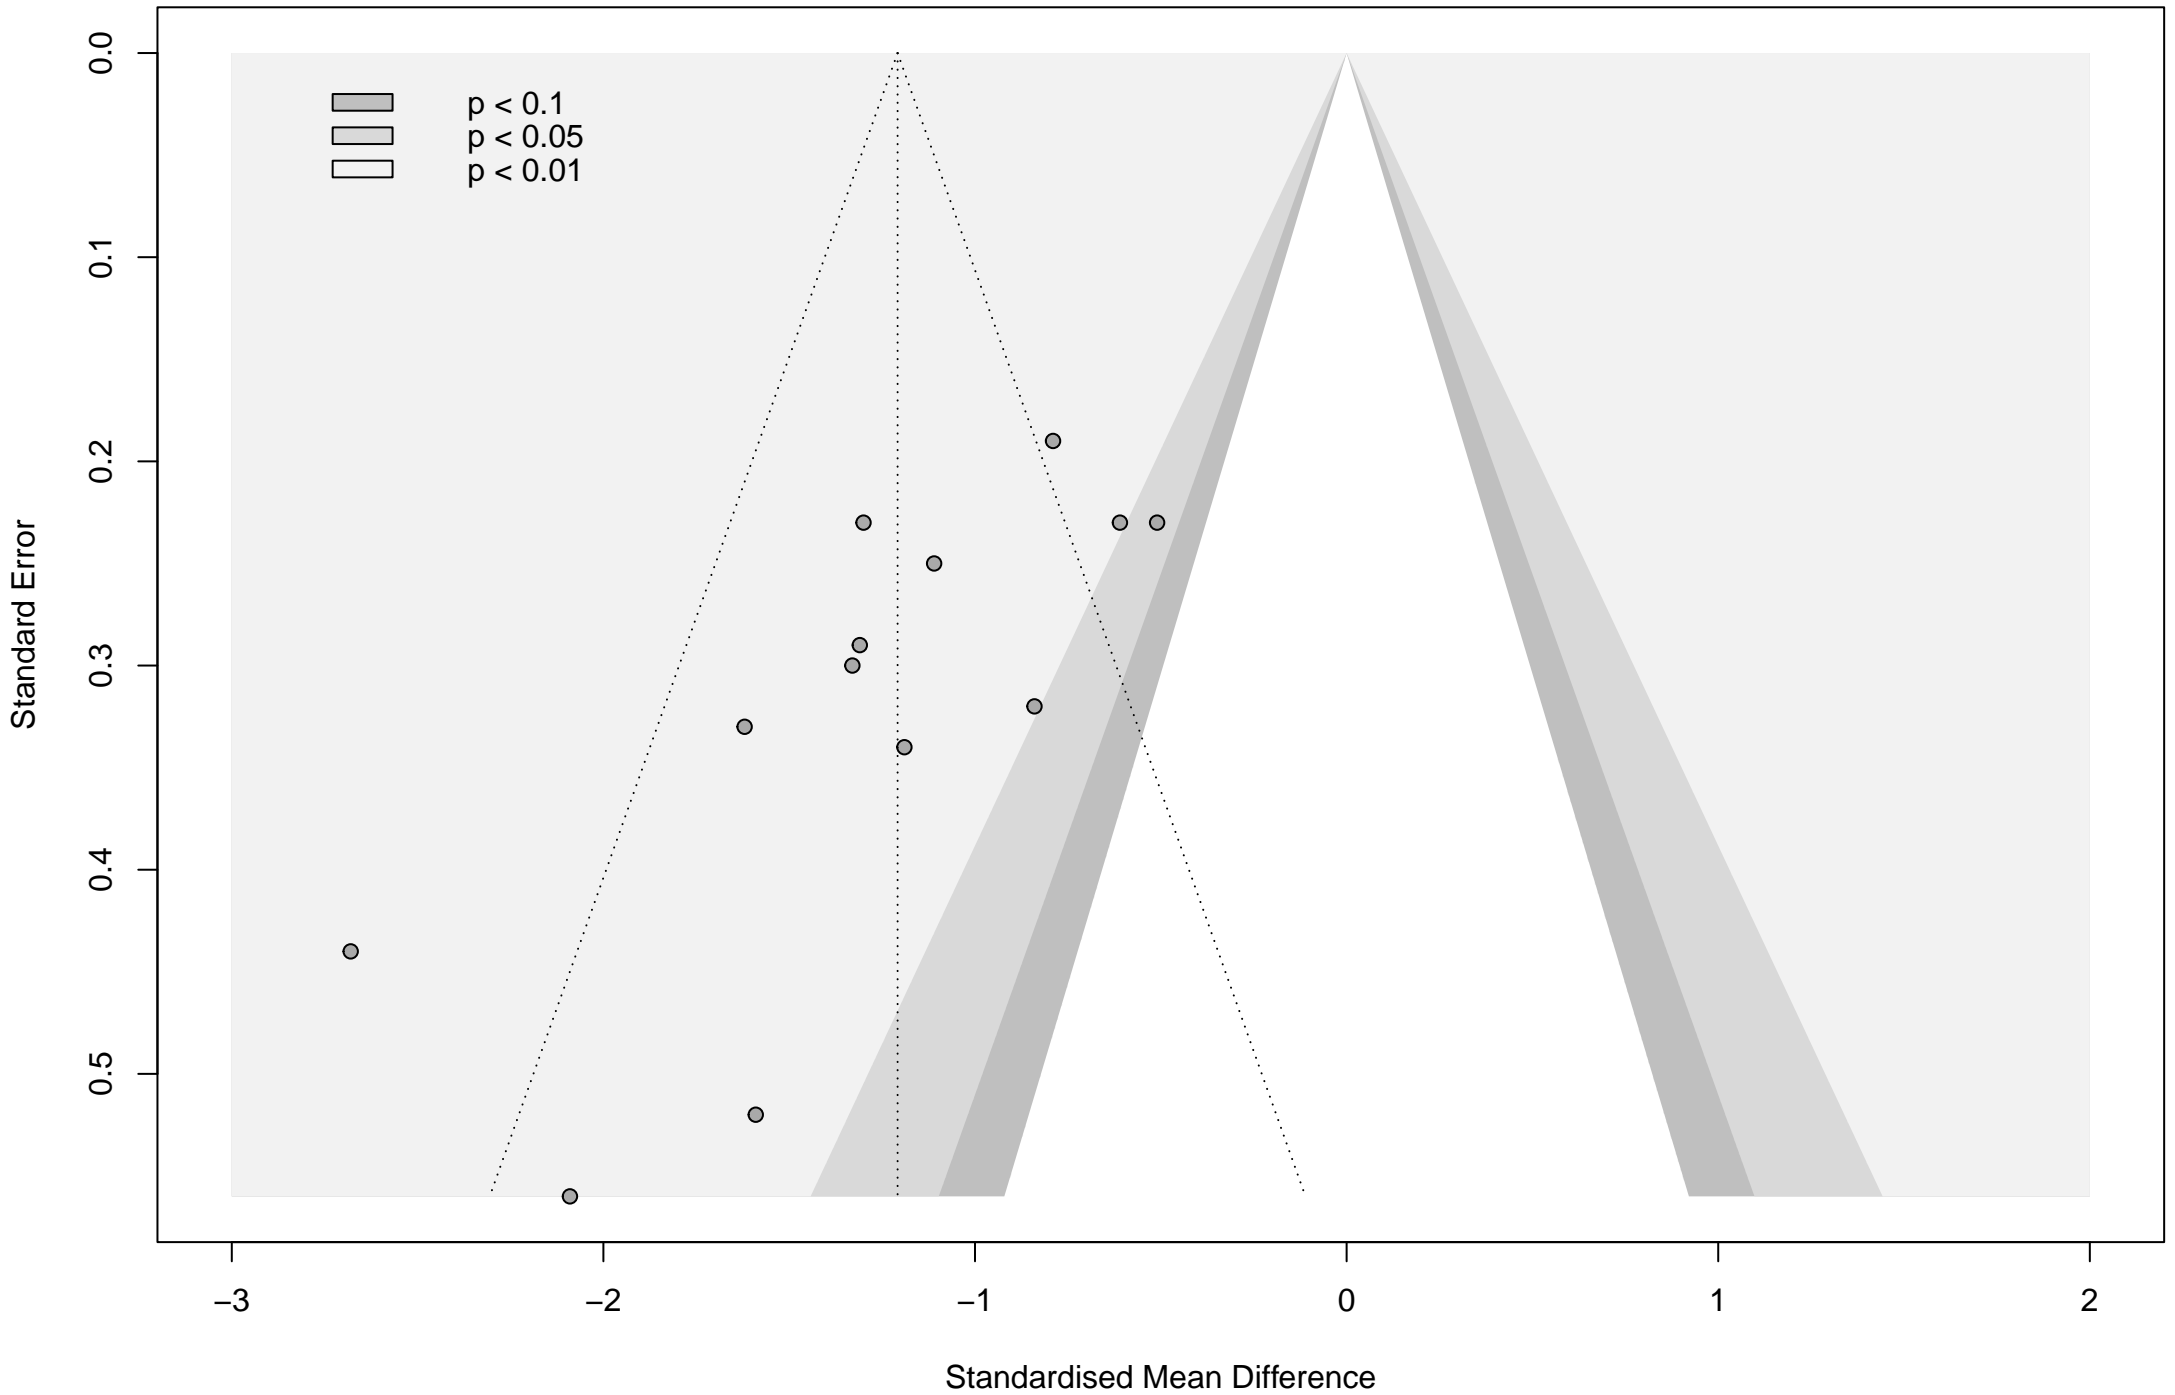

Supplement: Supplementary file 1 [file supplementary › Supplemental Figure 2. Contour-enhanced funnel plot.pdf]

Funnel Plot (Trim & Fill Method)

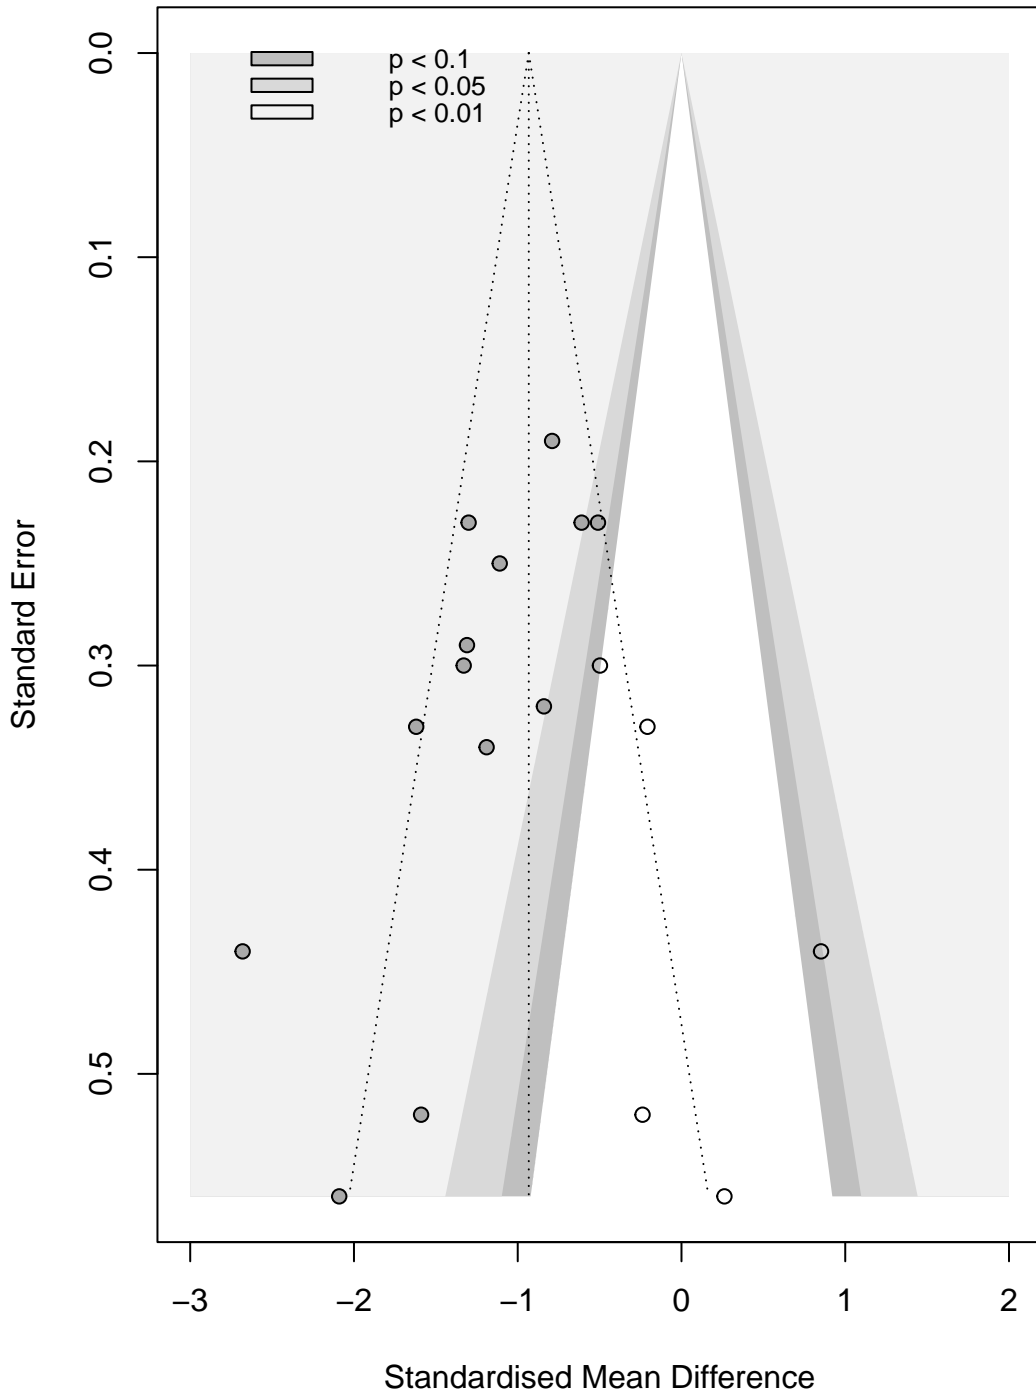

Funnel Plot (Trim & Fill Method) – Outliers Removed

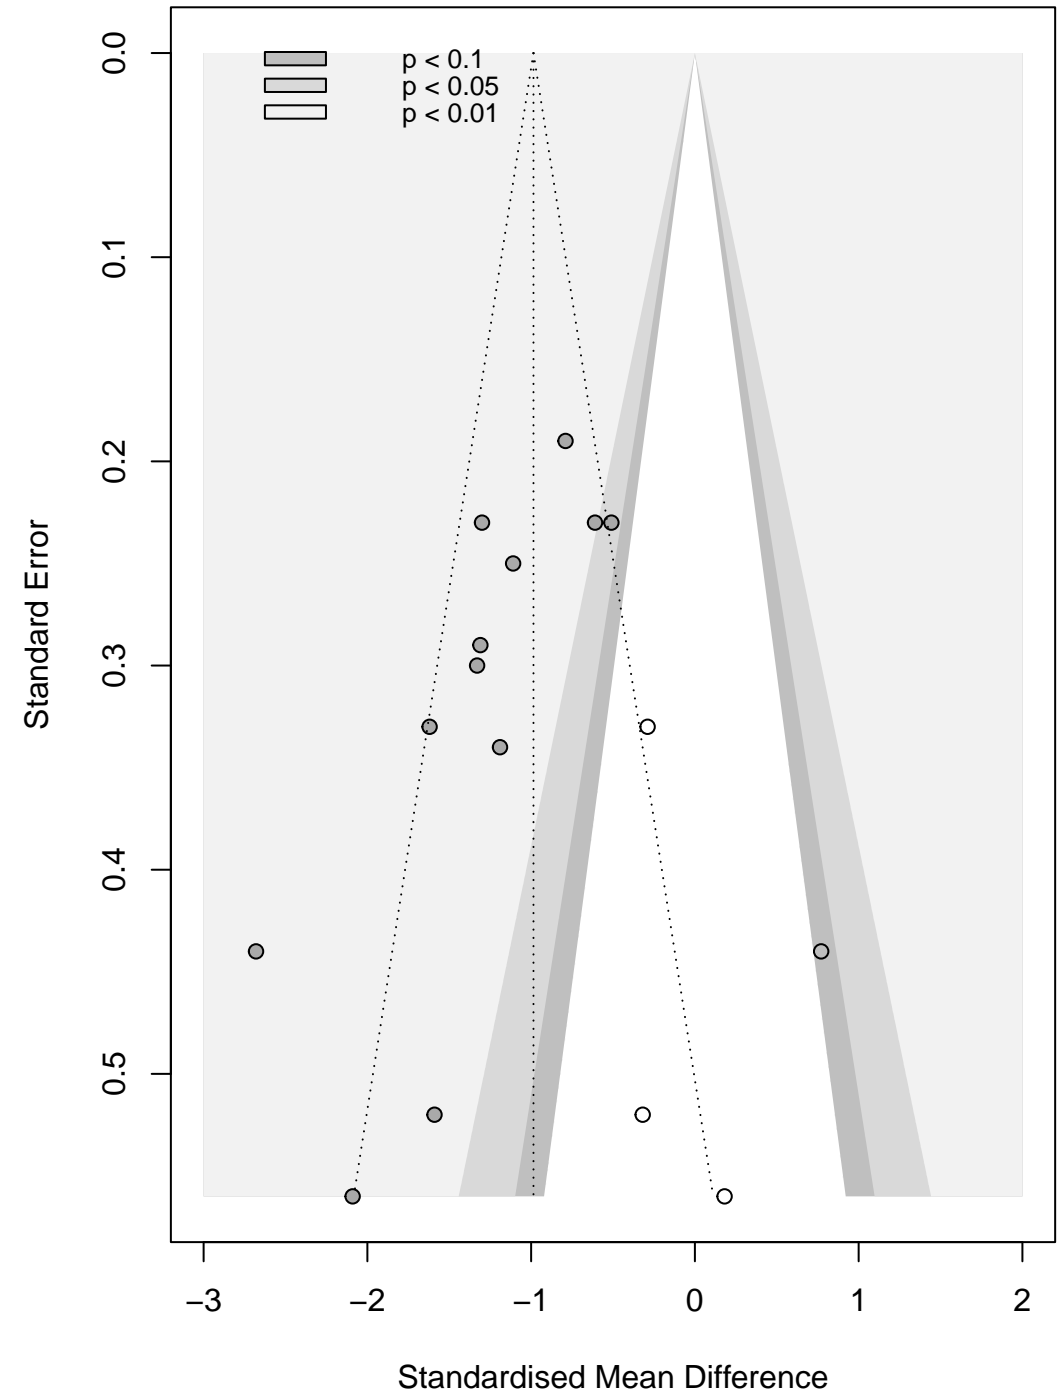

Supplement: Supplementary file 1 [file supplementary › Supplemental Figure 3. Funnel Plot (Trim & Fill Method).pdf]
